# Supplementary material
Source: publisher figshare collection journal article supplement (https://gsajournals.figshare.com/ndownloader/files/14541329)
Supplement: Supplementary file 1 [file 14541329]

## Sheet: Sheet1
Table S1. The description of CC strains, the sequenced representative sample, and other corresponding information
Strain	# of Founders	Origin of Strain	Mouse originates from the colony	Total Generations of MRCA	Inbreeding Generations of MRCA	MRCA Birthdate	Total Generations of Sequenced Sample	Inbreeding Generations of Sequenced Sample	Sex of Sequenced sample	Seq Birthdate	Average birthdate of MINI samples	Change in generation from MRCA to seq	N of Days between DOB MRCA and Sequenced sample	Sequenced by	BWT name	GigaMUGA sample genotyped	% het in MRCA	% het (autosomes) in sequenced sample	Read coverage	Reads (N)	Bases (N)	BWT bits per base	Standard Coverage	Read_length	Mitochondria	Chromosome Y	Funnel Code
CC083/Unc	8	UNC	UNC	16.5	14.5	2014-08-14	19	17	M	2016-04-13	2016-09-20	2.5	608	UNC	CC083M3234_UNC_UNC	CC083m3234	31.48	15.4	326753232x150x2	653506464	98025969600	1.41	35.6	150	H	F	HGADCEBF
CC082/Unc	8	UNC	UNC	21	19	2014-09-17	25	23	M	2016-05-03	2018-06-05	4	594	UNC	CC082M0505_UNC_UNC	CC082m505	22.77	5	339043137x150x2	678086274	101712941100	1.24	37	150	A	D	FEAHCBGD
CC081/Unc	8	UNC	UNC	17	15	2015-08-16	20	18	M	2016-04-03	2018-02-25	3	231	UNC	CC081M0332_UNC_UNC	CC081/Unc_M332	21.92	3.7	397574383x150x2	795148766	120067463666	0.96	43.4	150	C	F	CDBEGAHF
CC080/TauUnc	8	TAU	UNC	19.5	17.5	2015-05-13	23	21	M	2016-06-01	2018-02-01	3.5	385	UNC	CC080M1283_UNC_UNC	CC080/TauUnc_M1283	22.19	3.77	376755529x150x2	753511058	113780169758	0.94	41.1	150	F	D	CHGDFABE
CC079/TauUnc	8	TAU	UNC	20.5	18.5	2015-04-10	24	22	M	2016-04-18	2018-01-02	3.5	374	UNC	CC079M1086_UNC_UNC	CC079/TauUnc_M1086	6.77	4.5	390405014x150x2	780810028	117902314228	1.04	42.6	150	A	H	GFDHABEC
CC078/TauUnc	8	TAU	UNC	18	16	2014-05-22	24	22	M	2016-07-16	2018-02-06	6	786	UNC	CC078M1502_UNC_UNC	CC078/TauUnc_M1502	14.3	1.7	379024854x150x2	758049708	114465505908	0.97	41.3	150	A	E	GDHEAFCB
CC076/Unc	8	UNC	UNC	16	14	2013-08-02	21	19	M	2015-04-30	2017-01-15	5	636	UNC	CC076M508_UNC_UNC	CC076/Unc_M508	12.92	7.09	320954699x151x2	641909398	96928319098	1.06	35.1	150	C	A	CDHEBGFA
CC075/Unc	8	UNC	UNC	19	17	2013-07-18	21	19	M	2014-07-16		2	363	NYGC	CC075M516_UNC_NYGC	CC075/Unc(OR3260)M516	11.9	4.15	349694065x152x2	699388130	106306995760	1.18	38.5	150	E	A	EBFGCHDA
CC074/Unc	8	UNC	UNC	14	12	2011-08-13	21	19	M	2015-02-13	2018-04-16	7	1280	NYGC	CC074M495_UNC_NYGC	CC074_Uncm495	10.3	3.8	499585255x152x2	999170510	151873917520	1.1	55	150	G	D	GHBAFECD
CC073/Unc	8	UNC	UNC	20	18	2011-08-04	27	25	M	2015-01-06		7	1251	NYGC	CC073M796_UNC_NYGC	CC073/Unc(OR1515)M796	6.6	0.54	539599774x152x2	1079199548	164038331296	1.09	59.5	150	B	G	BEACHDFG
CC072/TauUnc	6	TAU	UNC	25	23	2012-08-13	30	28	M	2014-08-13	2018-02-02	5	730	NYGC	CC072M3054_UNC_NYGC	CC072/TauUnc_M3054	0.8	0.33	359833913x152x2	719667826	109389509552	1.08	39.6	150	D/A	E
CC071/TauUnc	8	TAU	UNC	21	19	2013-11-22	24	22	M	2014-10-05	2018-02-11	3	317	NYGC	CC071M3425_UNC_NYGC	CC071/TauUnc_M3425	12.8	4.18	790470411x152x2	1580940822	240303004944	0.99	87.1	150	C	B	CHDFGAEB
CC070/TauUnc	8	TAU	UNC	22	20	2014-01-26	25	23	M	2015-03-10	2017-01-05	3	408	UNC	CC070M3849_UNC_UNC	CC070/TauUnc_M3849	12.4	4.6	347579221x151x2	695158442	104968924742	1.17	38	150	G	E	GHFCDBAE
CC068/TauUnc	8	TAU	UNC	20	18	2013-12-04	21	19	M	2014-01-27	2018-01-14	1	54	NYGC	CC068M3696_UNC_NYGC	CC068/TauUnc_M3696	14.1	9.27	350088541x152x2	700177082	106426916464	1.14	38.6	150	G	B	GACEDFHB
CC065/Unc	8	UNC	UNC	16	14	2011-12-22	26	24	M	2014-08-14	2018-01-27	10	966	NYGC	CC065M3566_UNC_NYGC	CC065/Unc_M3566	8.1	0.9	557062079x152x2	1114124158	169346872016	1.06	61.4	150	B	F	BDHEGCAF
CC063/Unc	8	UNC	UNC	18	16	2012-10-13	22	20	M	2014-08-01	2017-02-20	4	657	NYGC	CC063M615_UNC_NYGC	CC063/Unc_M615	7.2	3.35	546055512x152x2	1092111024	166000875648	1.05	60.2	150	F	A	FHEBCDGA
CC062/Unc	8	UNC	UNC	15	13	2012-10-19	19	17	M	2014-10-05	2018-03-04	4	716	NYGC	CC062M733_UNC_NYGC	CC062/Unc_M733	11.8	3.73	235444511x152x2	470889022	71575131344	1.22	25.9	150	F	E	FHGBDCAE
CC061/GeniUnc	8	GENIAD	UNC	18	16	2012-07-25	23	21	M	2014-09-19	2018-03-14	5	786	NYGC	CC061M887_UNC_NYGC	CC061/GeniUnc_M887	5.1	0.53	300942517x152x2	601885034	91486525168	1.15	33.2	150	D	F	DCEBHAGF
CC060/Unc	8	UNC	UNC	20	18	2013-05-11	25	23	M	2014-09-01	2018-02-11	5	478	NYGC	CC060M813_UNC_NYGC	CC060/Unc_M813	14.6	8.09	449554695x152x2	899109390	136664627280	1.08	49.5	150	E	B	EAFDGCHB
CC059/TauUnc	6	TAU	UNC	19	17	2013-03-03	24	22	M	2014-12-12	2018-02-03	5	649	NYGC	CC059M4642_UNC_NYGC	CC059/TauUnc_M4642	10.3	6.12	384857797x152x2	769715594	116996770288	1.05	42.4	150	A/D	C
CC058/Unc	8	UNC	UNC	16	14	2013-02-21	22	20	M	2014-11-08	2018-01-23	6	625	NYGC	CC058M773_UNC_NYGC	CC058/Unc_M773	15	6.02	416422537x152x2	832845074	126592451248	1.05	45.9	150	C	F	CGDHEBAF
CC057/Unc	8	UNC	UNC	16	14	2013-04-26	21	19	M	2014-12-13	2018-02-04	5	596	NYGC	CC057M750_UNC_NYGC	CC057/Unc_M750	10.7	2.54	438647332x152x2	877294664	133348788928	1.03	48.3	150	F	E	FHDAGCBE
CC056/GeniUnc	6	GENIAD	UNC	19	17	2012-05-07	27	25	M	2015-01-15	2017-01-11	8	983	NYGC	CC056M534_UNC_NYGC	CC056/GeniUnc_M534	4.3	0.23	430015036x152x2	860030072	130724570944	1	47.4	150	C	E
CC055/TauUnc	8	TAU	UNC	21	19	2013-05-17	26	24	M	2014-08-31	2018-03-07	5	471	NYGC	CC055M3799_UNC_NYGC	CC055/TauUnc_M3799	10.6	3.92	728297155x152x2	1456594310	221402335120	1.01	80.2	150	G	C	GAEHDFBC
CC053/Unc	8	UNC	UNC	16	14	2013-01-13	19	17	M	2014-05-03	2018-02-14	3	475	UNC	CC053M907_UNC_UNC	CC053_Uncm907	11.4	3.84	337454785x151x2	674909570	101911345070	1.1	36.9	150	F	D	FCAEBGHD
CC052/GeniUnc	8	GENIAD	UNC	16	14	2012-04-13	23	21	M	2014-10-14	2017-03-10	7	914	NYGC	CC052M675_UNC_NYGC	CC052/GeniUnc(AU8052)M675	10.4	4.35	508869589x152x2	1017739178	154696355056	1.08	56.1	150	H	E	HGFCDBAE
CC051/TauUnc	6	TAU	UNC	19	17	2012-05-30	25	23	M	2015-04-08	2018-02-08	6	1043	NYGC	CC051M6059_UNC_NYGC	CC051/TauUnc_M6059	6.9	1.48	559870660x152x2	1119741320	170200680640	1.07	61.7	150	A/D	C
CC050/Unc	8	UNC	UNC	23	21	2010-08-02	37	35	M	2015-05-18	2017-02-04	14	1750	NYGC	CC050M1820_UNC_NYGC	CC050/Unc_M1820	4.6	0.73	519223250x152x2	1038446500	157843868000	1.02	57.2	150	G	E	GHBDCAFE
CC049/TauUnc	8	TAU	UNC	19	17	2013-09-26	23	21	M	2015-02-26	2018-02-03	4	518	UNC	CC049M214_UNC_UNC	CC049/TauUnc_M4214	13.1	6.36	332525652x151x2	665051304	100422746904	1.11	36.4	150	B	F	BHCAEDGF
CC047/Unc	8	UNC	UNC	18	16	2012-10-28	21	19	M	2013-09-09	2017-01-29	3	316	NYGC	CC047M1079_UNC_NYGC	CC047/Unc_M1079	6.1	1.15	500184157x152x2	1000368314	152055983728	1.07	55.1	150	A	C	AFDGEBHC
CC046/Unc	8	UNC	UNC	19	17	2013-05-06	22	20	M	2014-06-20	2018-01-21	3	410	NYGC	CC046M1016_UNC_NYGC	CC046/Unc_M1016	10.3	4.88	329778428x152x2	659556856	100252642112	1.1	36.3	150	G	B	GCDEFHAB
CC045/GeniUnc	8	GENIAD	UNC	15	13	2013-06-05	19	17	M	2014-10-28	2018-02-21	4	510	NYGC	CC045M817_UNC_NYGC	CC045/GeniUnc_M817	11.7	6.12	336446194x152x2	672892388	102279642976	1.1	37.1	150	H	G	HBFCDEAG
CC044/Unc	8	UNC	UNC	20	18	2013-01-19	23	21	M	2014-04-30	2018-01-24	3	466	NYGC	CC044M1328_UNC_NYGC	CC044/Unc_M1328	10.2	2.65	596744582x152x2	1193489164	181410352928	1.03	65.8	150	C	G	CDFBEHAG
CC043/GeniUnc	8	GENIAD	UNC	25	23	2011-08-22	32	30	M	2014-10-02	2018-04-08	7	1137	NYGC	CC043M797_UNC_NYGC	CC043/GeniUnc_M797	4.7	0.97	427738107x152x2	855476214	130032384528	1.01	47.1	150	B	D	BHAGECFD
CC042/GeniUnc	7	GENIAD	UNC	20	18	2012-12-05	25	23	M	2014-06-06	2018-01-22	5	548	NYGC	CC042M4068_UNC_NYGC	CC042/GeniUnc_M4068	6.3	1	364106872x152x2	728213744	110688489088	1.07	40.1	150	G	B
CC041/TauUnc	6	TAU	UNC	14	12	2012-04-16	21	19	M	2014-10-03	2018-02-17	7	900	NYGC	CC041M5135_UNC_NYGC	CC041/TauUnc_M5135	9.5	2.54	364674519x152x2	729349038	110861053776	0.92	40.2	150	A/D	E
CC040/TauUnc	8	TAU	UNC	21	19	2012-08-20	24	22	M	2014-02-01	2018-02-26	3	530	NYGC	CC040M4198_UNC_NYGC	CC040/TauUnc_M4198	11.4	6.53	368654191x152x2	737308382	112070874064	1.09	40.6	150	D	H	DACEGBFH
CC039/Unc	8	UNC	UNC	16	14	2012-04-15	24	22	M	2014-10-28	2018-04-16	8	926	NYGC	CC039M3730_UNC_NYGC	CC039/Unc_M3730	10.3	5.06	135053148x152x2	291464978	41056156980	1.23	14.9	150	G	H	GCDBAFEH
CC038/GeniUnc	8	GENIAD	UNC	21	19	2012-02-11	29	27	M	2014-09-16	2018-03-08	8	948	NYGC	CC038M806_UNC_NYGC	CC038/GeniUnc_M806	4.3	1.92	329009524x152x2	658019048	100018895296	1.11	36.3	150	C	F	CEDHGABF
CC037/TauUnc	6	TAU	UNC	36	34	2013-10-08	39	37	M	2014-11-15	2018-03-09	3	403	NYGC	CC037M955_UNC_NYGC	CC037/TauUnc_M955	1.1	0.02	405349955x152x2	810699910	123226386320	1.1	44.7	150	C	D
CC036/Unc	8	UNC	UNC	16	14	2010-11-26	25	23	M	2014-12-29	2018-03-26	9	1494	NYGC	CC036M819_UNC_NYGC	CC036/Unc_M819	9	6.15	352530552x152x2	705061104	107169287808	1.13	38.8	150	B	D	BFCEHAGD
CC035/Unc	8	UNC	UNC	18	16	2012-12-08	26	24	M	2015-11-18	2018-02-28	8	1075	UNC	CC035M1489_UNC_UNC	CC035_Uncm1489	11.2	3.49	338652909x151x2	677305818	102273178518	1.07	37.1	150	F	A	FEGHCBDA
CC034/Unc	8	UNC	UNC	16	14	2011-10-27	24	22	M	2014-10-16		8	1085	NYGC	CC034M734_UNC_NYGC	CC034/Unc_M734	9.3	2.28	317212862x152x2	634425724	96432710048	1.15	35	150	H	D	HCGABEFD
CC033/GeniUnc	8	GENIAD	UNC	18	16	2011-09-30	26	24	M	2014-10-02	2018-02-19	8	1098	NYGC	CC033M571_UNC_NYGC	CC033/GeniUnc_M571	9.3	2.68	569389494x152x2	1138778988	173094406176	1.24	62.7	150	F	H	FECGABDH
CC032/GeniUnc	7	GENIAD	UNC	16	14	2011-08-19	24	22	M	2014-09-17	2018-01-19	8	1125	NYGC	CC032M1247_UNC_NYGC	CC032/GeniUnc_M1247	8.6	3.71	605563017x152x2	1211126034	184091157168	1.02	66.7	150	A/D	G
CC031/GeniUnc	6	GENIAD	UNC	19	17	2011-08-10	25	23	M	2014-05-18	2018-02-18	6	1012	NYGC	CC031M411_UNC_NYGC	CC031/GeniUnc_M411	8.3	4.86	432339517x152x2	864679034	131431213168	1.06	47.6	150	D/A	B
CC030/GeniUnc	8	GENIAD	UNC	19	17	2011-08-16	29	27	M	2014-12-14	2018-01-23	10	1216	NYGC	CC030M1011_UNC_NYGC	CC030/GeniUnc_M1011	8.4	1	488272149x152x2	976544298	148434733296	1.07	53.8	150	F	C	FEAGBHDC
CC029/Unc	8	UNC	UNC	18	16	2013-02-09	23	21	M	2015-02-27	2018-02-18	5	748	NYGC	CC029M720_UNC_NYGC	CC029/Unc_M720	8.9	6.2	327640286x152x2	655280572	99602646944	1.14	36.1	150	H	E	HCDAFGBE
CC028/GeniUnc	8	GENIAD	UNC	21	19	2011-08-24	32	30	M	2014-09-15	2018-01-10	11	1118	NYGC	CC028M899_UNC_NYGC	CC028/GeniUnc_M899	2.1	0.19	431557440x152x2	863114880	131193461760	1.04	47.5	150	E	F	EBDGACHF
CC027/GeniUnc	8	GENIAD	UNC	23	21	2012-07-05	28	26	M	2014-08-25	2018-03-11	5	781	NYGC	CC027M756_UNC_NYGC	CC027/GeniUnc_M756	8.2	6.34	419768994x152x2	839537988	127609774176	1.06	46.3	150	F	B	FDCEAGHB
CC026/GeniUnc	7	GENIAD	UNC	23	21	2011-09-25	31	29	M	2015-12-29	2018-03-19	8	1556	UNC	CC026M3004_UNC_UNC	CC026/GeniUnc_M3004	4.6	0.57	343615608x150x2	687231216	103771913616	1.08	37.6	150	F	E
CC025/GeniUnc	8	GENIAD	UNC	17	15	2011-07-12	26	24	M	2015-04-02	2018-01-15	9	1360	NYGC	CC025M1062_UNC_NYGC	CC025/GeniUnc_M1062	5.3	0.82	446341853x151x2	892683706	135687923312	1.05	49.2	150	F	D	FECBGHAD
CC024/GeniUnc	8	GENIAD	UNC	21	19	2012-01-04	27	25	M	2014-12-17	2018-02-04	6	1078	NYGC	CC024M1060_UNC_NYGC	CC024/GeniUnc_M1060	3.6	1.86	505682534x151x2	1011365068	153727490336	1.05	55.7	150	A	D	ABFHECGD
CC023/GeniUnc	8	GENIAD	UNC	17	15	2011-12-28	25	23	M	2014-10-03	2018-03-18	8	1010	NYGC	CC023M704_UNC_NYGC	CC023/GeniUnc_M704	8.6	1.62	255557323x151x2	511114646	77689426192	1.22	28.2	150	D	A	DBHEGFCA
CC022/GeniUnc	8	GENIAD	UNC	16	14	2012-01-16	23	21	M	2014-09-09	2017-02-06	7	967	NYGC	CC022M444_UNC_NYGC	CC022/GeniUnc_M444	7.4	0.02	491943426x151x2	983886852	149550801504	1.04	54.2	150	A	G	AHDEFBCG
CC021/Unc	8	UNC	UNC	22	20	2011-11-01	31	29	M	2015-05-06	2018-02-13	9	1282	NYGC	CC021M1515_UNC_NYGC	CC021/Unc_M1515	6.3	0	534166301x151x2	1068332602	162386555504	1.06	58.9	150	G	B	GCFHDEAB
CC020/GeniUnc	8	GENIAD	UNC	22	20	2012-04-05	29	27	M	2014-09-17	2017-03-27	7	895	NYGC	CC020M533_UNC_NYGC	CC020/GeniUnc(AU8054)M533	4.5	2.83	609021870x151x2	1218043740	185142648480	1.04	67.1	150	G	B	GFHDEACB
CC019/TauUnc	6	TAU	UNC	18	16	2013-03-10	25	23	M	2014-10-09	2018-01-21	7	578	UNC	CC019M6839_UNC_UNC	CC019/TauUnc_M6839	9	1.93	278126388x100x2	556252776	56181530376	1.42	20.3	100	E	C
CC018/Unc	8	UNC	UNC	15	13	2012-04-05	23	21	M	2015-03-27	2018-02-09	8	1086	NYGC	CC018M1136_UNC_NYGC	CC018/Unc_M1136	9.6	1.75	343328857x151x2	686657714	104371972528	1.16	37.8	150	B	D	BCFAHGED
CC017/Unc	8	UNC	UNC	17	15	2012-03-26	26	24	M	2014-10-28	2017-12-05	9	946	NYGC	CC017M1453_UNC_NYGC	CC017/Unc_M1453	7.4	2.4	380706011x151x2	761412022	115734627344	1.12	41.9	150	C	B	CGHAFDEB
CC016/GeniUnc	7	GENIAD	UNC	19	17	2011-08-17	29	27	M	2015-04-25	2018-03-26	10	1347	NYGC	CC016M1077_UNC_NYGC	CC016/GeniUnc_M1077	3.7	0.52	340475063x151x2	680950126	103504419152	1.12	37.5	150	H	A
CC015/Unc	8	UNC	UNC	17	15	2010-08-30	27	25	M	2014-09-16	2018-02-05	10	1478	NYGC	CC015M1649_UNC_NYGC	CC015/Unc_M1649	8.6	4.41	363662427x151x2	727324854	110553377808	1.12	40.1	150	A	C	AEFGDBHC
CC013/GeniUnc	7	GENIAD	UNC	24	22	2012-02-03	32	30	M	2014-09-27	2018-03-22	8	967	NYGC	CC013M1075_UNC_NYGC	CC013/GeniUnc_M1075	0.5	0	388100388x151x2	776200776	117982517952	1.23	42.8	150	E	E
CC012/GeniUnc	8	GENIAD	UNC	20	18	2011-12-11	25	23	M	2014-07-18	2018-02-12	5	950	NYGC	CC012M1359_UNC_NYGC	CC012/GeniUnc_M1359	9.3	1.08	525930704x151x2	1051861408	159882934016	1.08	57.9	150	B	A	BGCFEDHA
CC011/Unc	8	UNC	UNC	19	17	2011-04-26	31	29	M	2015-04-05	2018-03-14	12	1440	NYGC	CC011M3070_UNC_NYGC	CC011/Unc_M3070	5.9	0.38	471938265x151x2	943876530	143469232560	1.12	52	150	E	C	EDBFAGHC
CC010/GeniUnc	8	GENIAD	UNC	21	19	2011-08-15	33	31	M	2014-08-31	2018-04-15	12	1112	NYGC	CC010M3518_UNC_NYGC	CC010/GeniUnc_M3518	3.4	1.43	362378258x151x2	724756517	110162990584	1.19	39.9	150	A	C	AEBGFDHC
CC009/Unc	8	UNC	UNC	16	14	2011-04-07	29	27	M	2015-03-03	2017-05-20	13	1426	NYGC	CC009M3045_UNC_NYGC	CC009/Unc_M3045	8.4	2.95	342552992x151x2	685105984	104136109568	1.06	37.7	150	E	C	EBAGDFHC
CC008/GeniUnc	8	GENIAD	UNC	17	15	2012-03-06	28	26	M	2015-03-20	2018-03-10	11	1109	UNC	CC008M983_UNC_UNC	CC008/GeniUnc_M983	5.3	0.82	341870984x151x2	636332044	96722470688	0.95	37.4	150	H	F	HEBACGDF
CC007/Unc	8	UNC	UNC	18	16	2012-02-25	27	25	M	2014-10-06	2018-03-26	9	954	NYGC	CC007M3406_UNC_NYGC	CC007/Unc_M3406	9.8	3.6	380198194x151x2	760396388	115580250976	1.03	41.9	150	B	D	BAECHGFD
CC006/TauUnc	8	TAU	UNC	18	16	2012-05-09	25	23	M	2014-10-16	2018-04-01	7	890	NYGC	CC006M4698_UNC_NYGC	CC006/TauUnc_M4698	8.3	4.12	432698054x151x2	865396108	131540208416	1.07	47.7	150	G	E	GHFADCBE
CC005/TauUnc	8	TAU	UNC	24	22	2011-08-16	38	36	M	2015-02-19	2018-03-05	14	1283	NYGC	CC005M4714_UNC_NYGC	CC005/TauUnc_M4714	1.1	0.63	551956456x151x2	1103912912	167794762624	1.04	60.8	150	D	E	DABCFGHE
CC004/TauUnc	8	TAU	UNC	23	21	2011-08-16	31	29	M	2014-10-17	2018-03-21	8	1158	NYGC	CC004M4292_UNC_NYGC	CC004/TauUnc_M4292	5.2	2.29	585261684x151x2	1170523368	177919551936	1.02	64.5	150	C	D
CC003/Unc	8	UNC	UNC	20	18	2011-10-31	31	29	M	2014-12-01	2018-03-25	11	1127	NYGC	CC003M4601_UNC_NYGC	CC003/Unc_M4601	8.9	0.52	489986417x151x2	979972834	148955870768	1.08	54	150	E	D	EAGBHCFD
CC002/Unc	8	UNC	UNC	18	16	2011-10-05	27	25	M	2014-10-17	2018-02-15	9	1108	NYGC	CC002M4575_UNC_NYGC	CC002/Unc_M4575	10.2	4.04	582934857x151x2	1165869714	177212196528	1.03	64.2	150	G	F	GCDHEABF
CC001/Unc	8	UNC	UNC	20	18	2011-11-15	29	27	M	2014-07-22	2018-02-24	9	980	NYGC	CC001M4363_UNC_NYGC	CC001/Unc_M4363	4.6	3.21	399934991x151x2	799869982	121580237264	1.11	44.1	150	B	G	BECADHFG
